# Supplementary material for: Signal transmission encryption based on dye-doped chiral liquid crystals via tunable and efficient circularly polarized luminescence
Source: Royal Society of Chemistry journal article supplement (doi:10.1039/d1ma00368b), 2021-01-01
Supplement: d1ma00368b1.pdf [file d1ma00368b1.pdf]

## **Electronic Supplementary Information for**

### **Signal transmission encryption based on dye-doped chiral liquid crystal *via* tunable and efficient circularly polarized luminescence**

**Chengxi Li,<sup>ab</sup> Xuefeng Yang,<sup>ab</sup> Jianlei Han,<sup>a</sup> Wenjing Sun<sup>a</sup> and Pengfei Duan<sup>\*ab</sup>**

- a. CAS Center for Excellence in Nanoscience, CAS Key Laboratory of Nanosystem and Hierarchical Fabrication, National Center for Nanoscience and Technology (NCNST), No. 11 ZhongGuanCun BeiYiTiao, Beijing 100190, P. R. China.
- b. University of Chinese Academy of Sciences, Beijing 100049, P. R. China.  
E-mail: duanpf@nanoctr.cn; Tel: +86-10-82545510

## S1. Materials and Methods

**Materials:** Commercial room-temperature liquid crystal, SLC1717, was bought from the Chengzhi Yonghua Display Material Co., Ltd. Chiral dopant, *R/S*-811, was bought from the TOKYO Chemical Industry Co., Ltd. The dye of Coumarin 6 was brought from Shanghai Acme Biochemical Co., Ltd. Common electronic components including Arduino UNO and photoconductor were purchased on Taobao. Optics were bought from Thorlabs, inc.

**Instrumentation:** UV-vis spectrum were measured on Hitachi U-3900 spectrophotometer. Fluorescence spectrum and stability were recorded on a Zolix Omin- $\lambda$ 500i monochromator with photomultiplier tube PMTH-R 928 using an external laser as the excitation source. The laser was bought from Changchun New Industries Optoelectronics Technology Co., Ltd. CPL spectrum were measured on JASCO CPL-200 spectrophotometers. The polarizing optical microscope images were recorded on Leica DM2700M upright materials microscope. Lifetime measurements were recorded on the NanoLOG-TCSPC(Nanolog) spectrometer using time-correlated single-photon counting. X-ray diffraction (XRD) spectrum were recorded on Rigaku D/Max-2500 X-ray diffractometer (Japan) with Cu/K $\alpha$  radiation ( $\lambda = 1.5406 \text{ \AA}$ ).

**Samples Fabrication:** The used chiral nematic liquid crystals (N\*LC) samples were fabricated by the following steps. First, add the dichloride solution of *R/S*-811, SLC1717 and C6 in proportion to a 1 mL centrifuge tube. As for the prepared achiral liquid crystals, *R/S*-811 is no need to add. Subsequently, the resulting solution was well mixed by vortex to obtain a uniform solution. After that, the solution was transferred to the substrate and then dichloromethane was evaporated slowly by using a hot stage. Finally, the heating mixture was loaded into the liquid crystal cell by capillary action.

## S2. Supplementary Figures

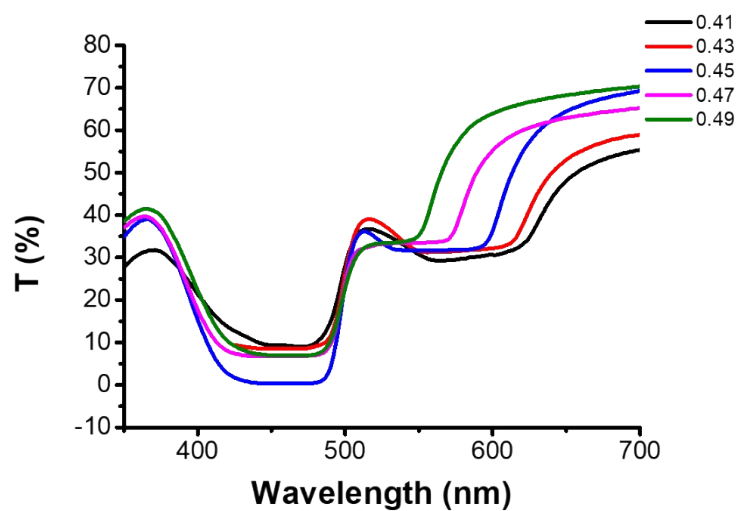

**Fig. S1** The transmittances of N\*LC with different weight ratios of R811/SLC1717, C6/SLC1717 = 1 wt%. Cell thickness = 29  $\mu\text{m}$ .

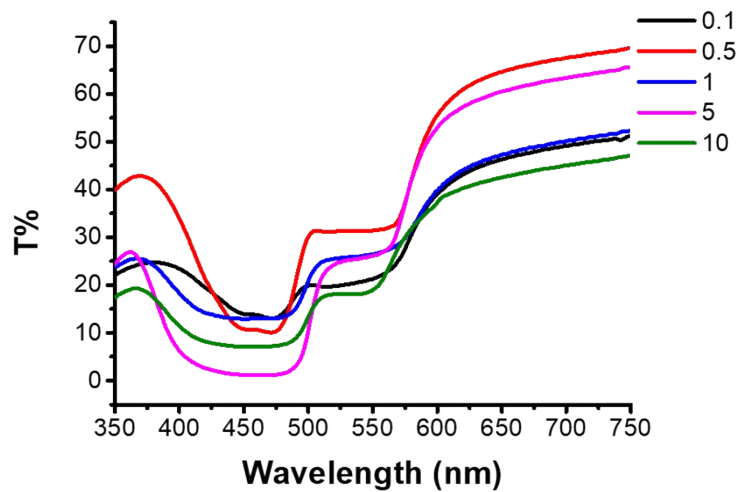

**Fig. S2** The transmittances of N\*LC with different weight percentage of C6/SLC1717 (wt%), R811/SLC1717 = 47 wt%. Cell thickness = 29  $\mu\text{m}$ .

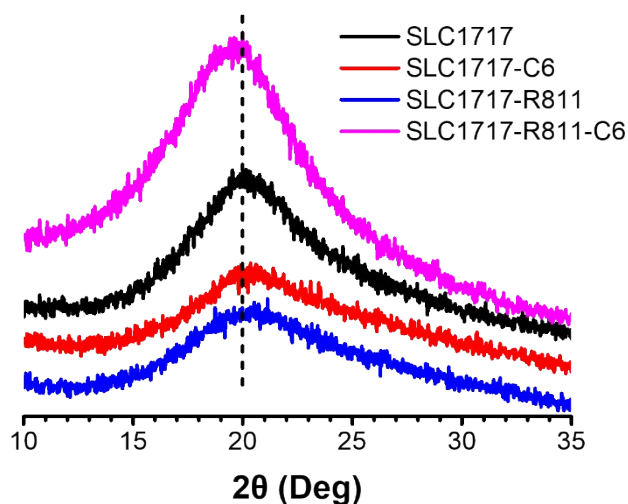

**Fig. S3** the XRD spectrum of liquid crystal with various components, C6/SLC1717 = 1 wt% (red line), R811/SLC1717 = 47 wt% (blue line) and the weight ratios C6/R811/SLC1717 = 1/47/100 (purple line).

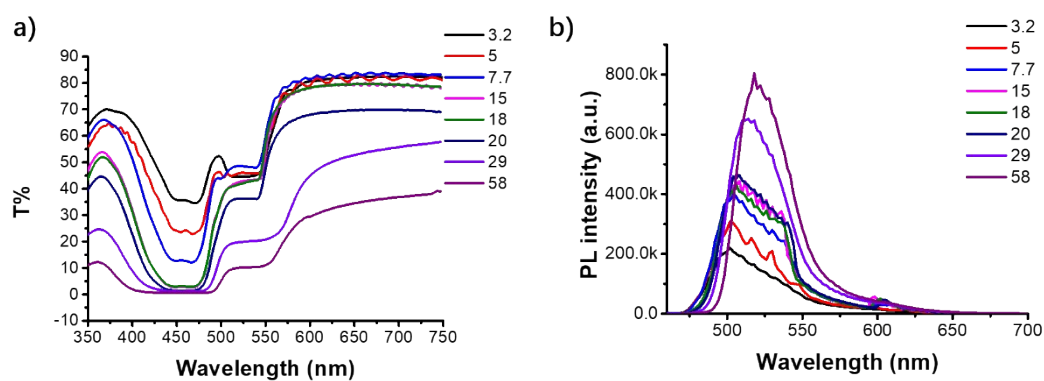

**Fig. S4** (a) The transmittances of N\*LC in different thickness. (b) the emission spectrum of N\*LC in different thickness, excited by 447 nm laser. Unit:  $\mu\text{m}$ , the weight ratios C6/R811/SLC1717 = 1/47/100.

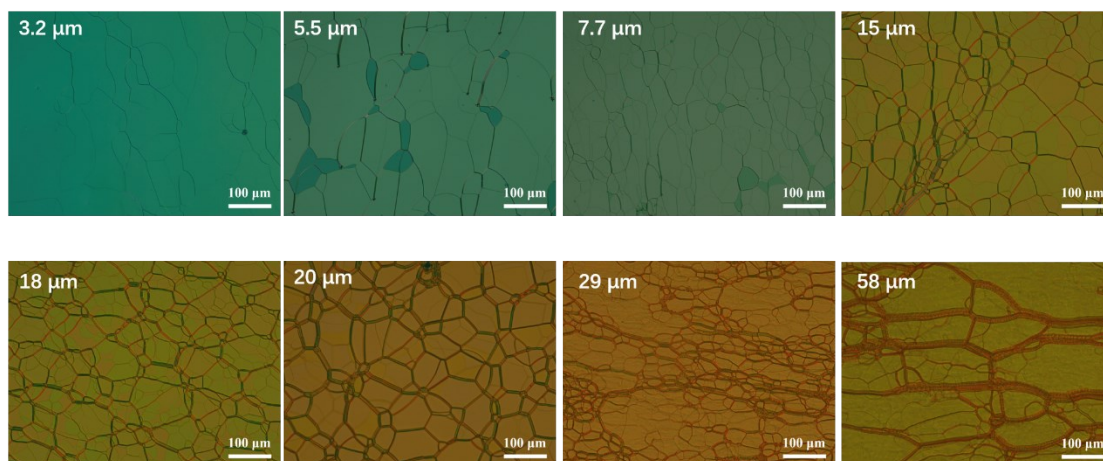

**Fig. S5** The polarizing optical microscope images of N\*LC in different thickness, the weight ratios C6/R811/SLC1717 =1/47/100.

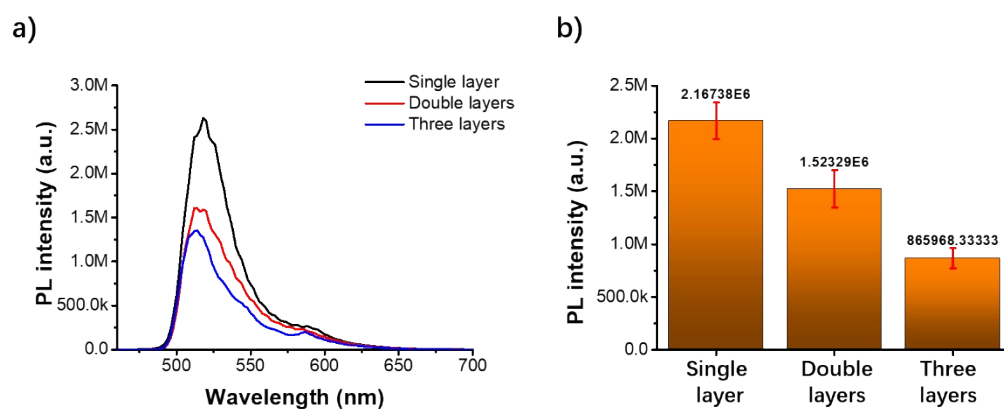

**Fig. S6** (a) The emission spectrum and (b) photoluminescence intensity at 524 nm of N\*LC in 58 μm cell stilted into single (1\*58 μm), double (2\*29 μm) and three layers (3\*20 μm), respectively. 447 nm laser excitation. The weight ratios C6/R811/SLC1717 = 1/47/100.

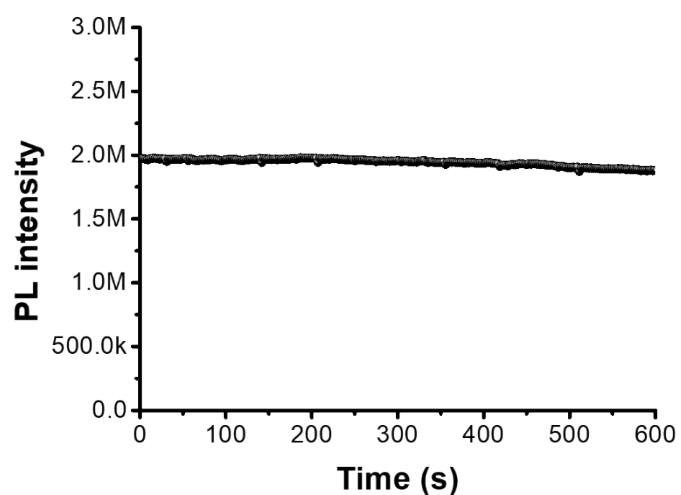

**Fig. S7** The stability test of N\*LC prepared by the weight ratios C6/R811/SLC1717=1/47/100, under the irritation of 360 nm laser, excitation intensity =  $1.27 \times 10^2 \text{ mW cm}^{-2}$ .

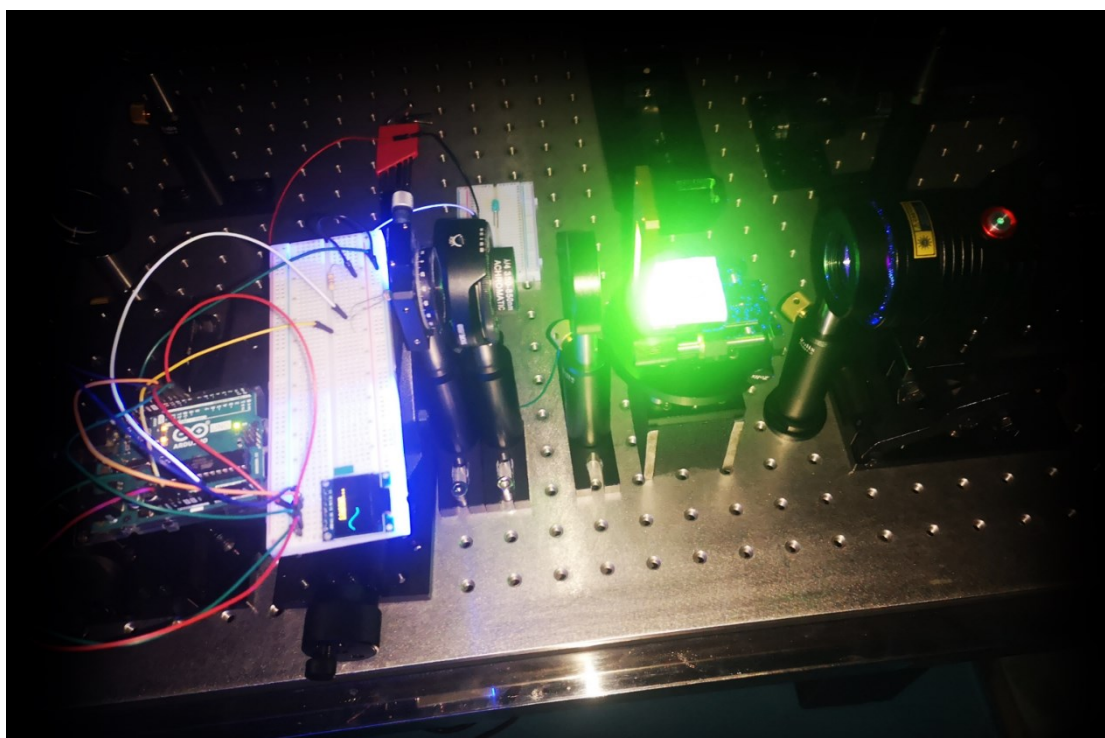

**Fig. S8** Photograph of encrypted functional signal generator. From right to left: 365 nm light source, 465 nm short pass, sample, 465 nm long pass, quarter-wave plate, linear polarizer, photoconductor, using Arduino UNO and a OLED screen to modulate and display the signal respectively.

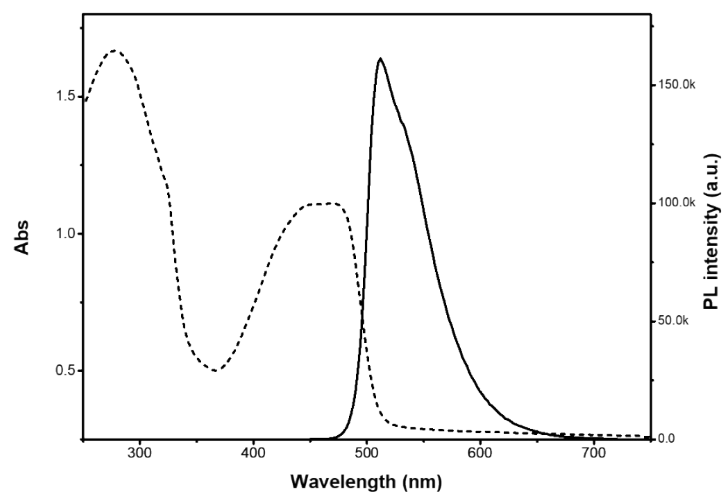

**Fig. S9** The absorption of achiral liquid crystal prepared by C6/SLC1717 = 1 wt% (dashed line) with corresponding emission spectrum (solid line),  $\lambda_{\text{ex}} = 360$  nm laser.

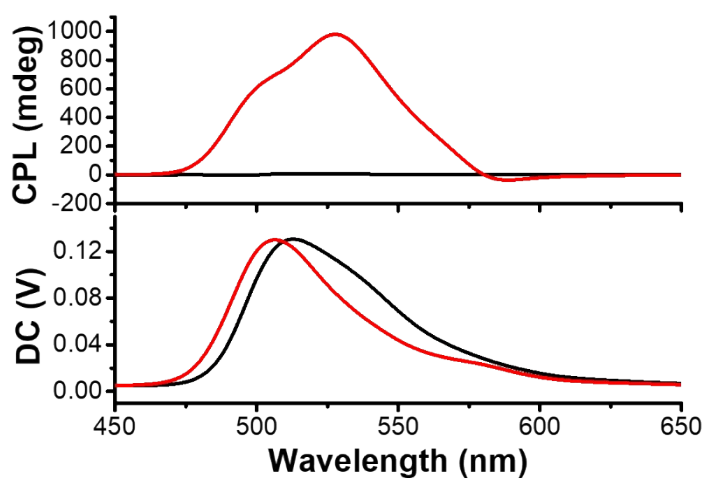

**Fig. S10** CPL spectrum of 47 wt% R811 (red line) and no R811 (black line) in SLC1717 with 1 wt% C6 ( $\lambda_{\text{ex}} = 380$  nm).

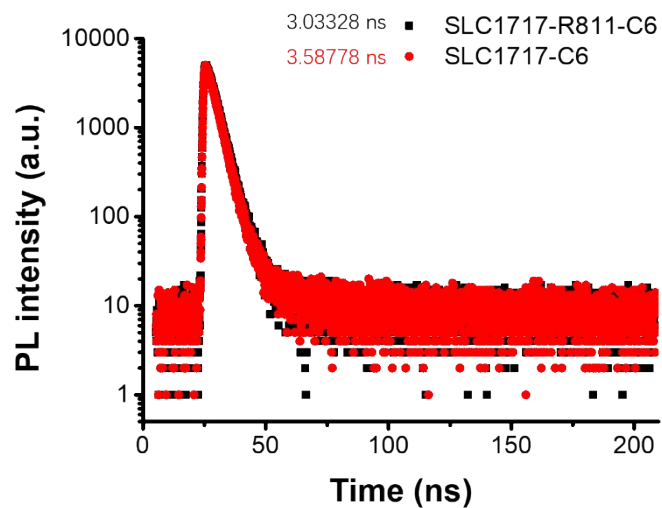

**Fig. S11** Time-resolved emission at 510 nm of the 47 wt% R811 (black square) and no R811 (red square) in SLC1717 with 1 wt% C6 ( $\lambda_{\text{ex}} = 344$  nm nanosecond laser).
